# Supplementary material for: Anti-Inflammatory Effects of Low-Dose Glucocorticoids Compensate for Their Detrimental Effects on Bone Mineral Density in Patients with Rheumatoid Arthritis
Source: MDPI journal article supplement (doi:10.3390/jcm10132944), 2021-06-30
Supplement: s1 [file s1]

**Table S1.** Baseline demographic and clinical characteristics of patients with RA after propensity score matching.

| Variable                                    | GC (N = 500) | No-GC (N = 100) | p Value |
|---------------------------------------------|--------------|-----------------|---------|
| Age, mean (years)                           | 62 ± 10.4    | 61 ± 8.41       | 0.48    |
| Sex                                         |              |                 |         |
| Women, N. (%)                               | 475 (95)     | 96 (96)         | 0.803   |
| Menopause, N. (%)                           | 408 (86.1)   | 85 (85)         | 0.519   |
| BMI, mean                                   | 23.3 ± 3.7   | 23.7 ± 3.33     | 0.285   |
| Smoking, N. (%)                             | 22 (4.4)     | 9 (9)           | 0.058   |
| Alcohol, N. (%)                             | 60 (12)      | 11 (11)         | 0.777   |
| RF positivity, N. (%)                       | 303 (60.6)   | 51 (51)         | 0.075   |
| Anti-CCP Ab positivity, N. (%)              | 149 (38.8)   | 38 (41.3)       | 0.659   |
| Disease duration (months)                   | 114.7 ± 76.6 | 100.2 ± 58.8    | 0.44    |
| DAS28-ESR                                   | 2.82 ± 1.1   | 2.59 ± 0.78     | 0.276   |
| DAS28-CRP                                   | 2.2 ± 0.9    | 1.96 ± 0.59     | 0.113   |
| Bone erosion, N. (%)                        | 178 (35.7)   | 21 (21)         | 0.005*  |
| Medication                                  |              |                 |         |
| Glucocorticoids                             |              |                 |         |
| Cumulative dose before BMD measurements (g) | 7.33 ± 6.81  | 5.99 ± 5.29     | 0.058   |
| Mean dose between BMD measurements (mg/day) | 2.3 ± 1.71   | NA              | NA      |
| NSAIDs, N. (%)                              | 316 (63.2)   | 61 (61)         | 0.546   |
| Methotrexate, N. (%)                        | 232 (46.4)   | 39 (39)         | 0.175   |
| Hydroxychloroquine, N. (%)                  | 336 (67.2)   | 70 (70)         | 0.585   |
| Sulfasalazine, N. (%)                       | 36 (7.2)     | 9 (9)           | 0.533   |
| Tacrolimus/cyclosporin, N. (%)              | 97 (19.4)    | 13 (13)         | 0.131   |
| Leflunomide, N. (%)                         | 80 (16)      | 7 (7)           | 0.02*   |
| Anti-TNF agents, N. (%)                     | 9 (1.8)      | 1 (1)           | > 0.999 |
| Adalimumab, N. (%)                          | 3 (0.6)      | 0 (0)           | > 0.999 |
| Etanercept, N. (%)                          | 1 (0.2)      | 1 (1)           | 0.306   |
| Golimumab, N. (%)                           | 2 (0.4)      | 0 (0)           | > 0.999 |
| Infliximab, N. (%)                          | 3 (0.6)      | 0 (0)           | > 0.999 |
| Abatacept, N. (%)                           | 3 (0.6)      | 0 (0)           | > 0.999 |
| Tocilizumab, N. (%)                         | 10 (2)       | 0 (0)           | 0.383   |
| Rituximab, N. (%)                           | 3 (0.6)      | 0 (0)           | > 0.999 |
| JAK inhibitors, N. (%)                      | 8 (1.6)      | 0 (0)           | 0.364   |

RA: rheumatoid arthritis, GC: glucocorticoid, BMI: body mass index, RF: rheumatoid factor, Anti-CCP Ab: anti-citrullinated protein antibody, DAS: disease activity score, ESR: erythrocyte sedimentation rate, CRP: C-reactive protein, 25(OH) D: 25-hydroxyvitamin D, BMD: bone mineral density, NSAIDs: non-steroidal anti-inflammatory drugs, TNF: tumor necrosis factor, JAK: Janus kinase, NA: not applicable. \* $p < 0.05$

**Table S2.** Annual change in BMD and new-onset osteoporosis rates between the GC users and the control group after propensity score matching.

| Variable                                                                                             | GC (N = 500)  | No-GC (N = 100) | p Value |
|------------------------------------------------------------------------------------------------------|---------------|-----------------|---------|
| Annual mean value of the absolute difference between baseline and follow-up BMD (g/cm <sup>2</sup> ) |               |                 |         |
| Lumbar spine                                                                                         | 0.013 ± 0.043 | 0.01 ± 0.04     | 0.683   |
| Femoral neck                                                                                         | 0.002 ± 0.032 | -0.001 ± 0.018  | 0.564   |
| Total hip                                                                                            | 0.001 ± 0.029 | -0.001 ± 0.02   | 0.392   |
| Annual % change in BMD (g/cm <sup>2</sup> )                                                          |               |                 |         |
| Lumbar spine                                                                                         | 1.6 ± 4.7     | 1.26 ± 4.44     | 0.693   |
| Femoral neck                                                                                         | -0.45 ± 4.44  | -0.53 ± 2.62    | 0.51    |
| Total hip                                                                                            | -0.42 ± 3.5   | -0.32 ± 1.8     | 0.328   |
| New-onset osteoporosis, N. (%)                                                                       | 21 (4.2)      | 6 (6)           | 0.494   |

BMD: bone densitometry, GC: glucocorticoid.

**Table S3.** Multiple linear regression analysis of risk factors associated with annualized BMD change after propensity score matching.

| Variable   | Lumbar Spine |         | Femoral Neck |         | Total Hip |         |
|------------|--------------|---------|--------------|---------|-----------|---------|
|            | β            | p Value | β            | p Value | β         | p Value |
| Univariate |              |         |              |         |           |         |
| Age        | 0.048        | 0.012*  | 0.005        | 0.783   | 0.001     | 0.923   |

|                        |        |          |        |          |        |         |
|------------------------|--------|----------|--------|----------|--------|---------|
| Menopause              | 1.584  | 0.005*   | -0.544 | 0.301    | 0.006  | 0.988   |
| BMI                    | 0.019  | 0.721    | -0.009 | 0.858    | -0.063 | 0.092   |
| Smoking                | 0.793  | 0.372    | -0.21  | 0.789    | 0.288  | 0.639   |
| Alcohol                | -0.052 | 0.931    | -0.205 | 0.7      | 0.039  | 0.926   |
| RF positivity          | -0.34  | 0.385    | -0.079 | 0.822    | 0.061  | 0.823   |
| Anti-CCP Ab positivity | -0.081 | 0.856    | 0.398  | 0.34     | 0.148  | 0.614   |
| Disease duration       | 0.003  | 0.219    | -0.001 | 0.881    | 0.002  | 0.365   |
| Baseline DAS28-ESR     | 0.696  | 0.003*   | 0.626  | 0.012*   | 0.418  | 0.022*  |
| Baseline DAS28-CRP     | 0.406  | 0.162    | 0.289  | 0.346    | 0.142  | 0.524   |
| $\Delta$ DAS28-ESR     | -1.783 | < 0.001* | -0.987 | < 0.001* | -1.058 | <0.001* |
| $\Delta$ DAS28-CRP     | -1.964 | < 0.001* | -1.051 | < 0.001* | -0.87  | <0.001* |
| Bone erosion           | 1.024  | 0.012    | 0.363  | 0.323    | 0.495  | 0.084   |
| Cumulative GC dose     | 0.093  | 0.001*   | 0.038  | 0.15     | 0.071  | 0.001*  |
| Calcium intake         | -0.64  | 0.11     | 0.272  | 0.449    | -0.092 | 0.745   |
| Vitamin D intake       | 1.186  | 0.046*   | 1.069  | 0.045*   | 0.805  | 0.053   |
| PPI use                | 0.211  | 0.785    | 0.113  | 0.43     | 0.841  | 0.761   |
| Multivariate           |        |          |        |          |        |         |
| Age                    | 0.011  | 0.698    | 0.004  | 0.863    | -0.003 | 0.874   |
| Menopause              | -0.157 | 0.84     | -0.448 | 0.547    | -0.238 | 0.659   |
| Baseline DAS28-ESR     | -0.464 | 0.099    | 0.063  | 0.835    | -0.334 | 0.117   |
| $\Delta$ DAS28-ESR     | -1.426 | 0.009*   | -0.665 | 0.259    | -1.904 | <0.001* |
| $\Delta$ DAS28-CRP     | -0.628 | 0.296    | -0.265 | 0.69     | 0.957  | 0.042   |
| Bone erosion           | 0.983  | 0.058    | 0.421  | 0.443    | 0.408  | 0.308   |
| Cumulative GC dose     | -0.024 | 0.5      | 0.051  | 0.172    | 0.026  | 0.347   |
| Vitamin D intake       | -0.335 | 0.633    | 0.636  | 0.411    | 0.238  | 0.66    |

BMD: bone mineral density, BMI: body mass index, RF: rheumatoid factor, Anti-CCP Ab: anti-citrullinated protein antibody, ESR: erythrocyte sedimentation rate, CRP: C-reactive protein, DAS: disease activity score, GC: glucocorticoid, PPI: proton pump inhibitor, NA: not applicable;  $\Delta$ DAS28-ESR is DAS28-ESR at the follow-up point minus baseline DAS28-ESR.  $\Delta$ DAS28-CRP is DAS28-CRP at the follow-up point minus baseline DAS28-CRP. \* $p < 0.05$
